# Supplementary material for: Natural history and outcomes in paediatric RASopathy‐associated hypertrophic cardiomyopathy
Source: PubMed Central journal article supplement (PMC10966228; doi:10.1002/ehf2.14637), 2024-01-13
Supplement: EHF2-11-923-s001.pdf [file EHF2-11-923-s001.pdf]

**Table S1:** Collaborating centres with corresponding patient numbers

| Centre                                 | Number of patients* |
|----------------------------------------|---------------------|
| Great Ormond Street Hospital, London   | 102                 |
| Bristol Royal Hospital for Children    | 15 (7 & 8)          |
| Birmingham Children's Hospital         | 12 (9 & 3)          |
| University Hospital of Wales, Cardiff  | 12 (8 & 4)          |
| Royal Brompton Hospital, London        | 11 (6 & 5)          |
| Glenfield Hospital, Leicester          | 8 (2 & 6)           |
| Royal Hospital for Children, Glasgow   | 8 (2 & 6)           |
| Evelina Children's Hospital, London    | 6 (2 & 4)           |
| Southampton General Hospital           | 5 (2 & 3)           |
| Alder Hey, Liverpool                   | 3 (2 & 1)           |
| Freeman's Hospital, Newcastle          | 2 (2 & 0)           |
| Leeds General Infirmary                | 2 (2 & 0)           |
| Our Lady's Children's Hospital, Dublin | 2 (2 & 0)           |
| John Radcliffe Hospital, Oxford        | 1 (1 & 0)           |

\*The numbers add up to more than the total number of patients in this study – this is because some patients were seen in the local paediatric cardiology centre as well as Great Ormond Street Hospital as a national reference centre and were not included twice in the study numbers. In the parenthesis there is the breakdown of numbers, first number is patients only seen at the local centre, second number is patients seen in both the local and reference centre

**Table S2:** Congenital heart defects by RASopathy syndrome

|                  | Total     | NS        | NSML     | CS       | CFCS     | Noonan-like |
|------------------|-----------|-----------|----------|----------|----------|-------------|
| ASD              | 16 (14.6) | 13 (17.8) | -        | -        | 1 (16.7) | 2 (14.3)    |
| VSD              | 8 (7.3)   | 5 (6.9)   | -        | -        | 1 (16.7) | -           |
| PVS              | 33 (30)   | 22 (30.1) | 2 (16.7) | 2 (33.3) | 4 (66.7) | 3 (21.4)    |
| PDA              | 5 (4.6)   | 3 (4.1)   | 1 (8.3)  | -        | -        | 1 (7.1)     |
| Dysplastic valve | 19 (17.3) | 14 (19.2) | -        | -        | 1 (16.7) | 2 (14.3)    |
| Polyvalvulopathy | 21 (19.1) | 16 (21.9) | 1 (8.3)  | 1 (16.7) | 1 (16.7) | 2 (14.3)    |
| AS               | 4 (3.6)   | 3 (4.1)   | -        | -        | 1 (16.7) | -           |
| Other            | 6 (5.5)   | 5 (6.9)   | -        | -        | -        | -           |
| >1               | 32 (29.1) | 25 (34.3) | -        | 1 (16.7) | 3 (50)   | 3 (21.4)    |
| None             | 45 (40.9) | 24 (32.9) | 8 (66.7) | -        | 2 (33.3) | 8 (57.1)    |
| Unknown          | 39 (26.2) | 38 (34.2) | -        | 1 (16.7) | -        | -           |

NS: Noonan syndrome, NSML: Noonan syndrome with multiple lentigines, CS: Costello syndrome, CFCS: cardiofaciocutaneous syndrome, ASD: atrial septal defect, VSD: ventricular septal defect, PVS: pulmonary valve stenosis, PDA: patent ductus arteriosus, AS: aortic valve stenosis

**Table S3:** Patients with Noonan like syndrome

| Patient number                                     | 1    | 2       | 3   | 4      | 5     | 6     | 7     | 8     | 9    | 10   | 11    |
|----------------------------------------------------|------|---------|-----|--------|-------|-------|-------|-------|------|------|-------|
| Baseline demographics and clinical characteristics |      |         |     |        |       |       |       |       |      |      |       |
| Gender                                             | M    | F       | F   | M      | M     | F     | M     | F     | M    | F    | M     |
| Proband?                                           | Yes  | Yes     | -   | -      | -     | Yes   | Yes   | Yes   | Yes  | Yes  | -     |
| Age at diagnosis (months)                          | 4.9  | 121.9   | -   | 133.4  | 135.2 | 0.4   | -     | 2.6   | 1.3  | 1.2  | -     |
| Age at baseline (months)                           | 29.4 | 63.8    | 7.7 | 133.4  | 135.2 | 0.43  | 0.53  | 1.15  | 0.8  | 11.9 | 16.3  |
| PMHx CHD                                           | No   | Yes     | No  | No     | No    | Yes   | Yes   | Yes   | No   | No   | No    |
| Extra-cardiac manifestations                       | Yes  | Yes     | No  | No     | No    | No    | Yes   | Yes   | No   | No   | -     |
| PMHx CCF                                           | No   | No      | -   | No     | No    | No    | No    | Yes   | Yes  | No   | -     |
| Symptoms                                           | No   | No      | No  | No     | No    | No    | No    | Yes   | Yes  | No   | No    |
| Medications                                        | No   | Yes     | No  | No     | No    | Yes   | No    | Yes   | Yes  | Yes  | No    |
| Outcomes                                           |      |         |     |        |       |       |       |       |      |      |       |
| Follow up (months)                                 | 216  | 206.7   | 216 | 159.33 | 216   | 100.1 | 102.8 | 11.4  | 18.6 | 94.3 | 144.9 |
| Death                                              | No   | Yes     | No  | Yes    | No    | No    | No    | Yes   | No   | No   | No    |
| Cause of death                                     | -    | Non CVS | -   | Unkwn  | -     | -     | -     | Unkwn | -    | -    | -     |
| Age at death (months)                              | -    | 12      | -   | 191.2  | -     | -     | -     | 2.4   | -    | -    | -     |
| SCD or equivalent event                            | No   | Yes     | No  | No     | No    | No    | No    | No    | Yes  | No   | No    |
| CCF Admission                                      | No   | No      | No  | No     | No    | No    | No    | No    | No   | No   | No    |
| Myectomy                                           | No   | No      | No  | No     | No    | No    | No    | No    | No   | No   | No    |
| Echocardiographic parameters                       |      |         |     |        |       |       |       |       |      |      |       |
| LVEDD (mm)                                         | -    | 25.7    | -   | -      | 36.1  | 26.6  | 32.2  | 14    | -    | 17.2 | -     |
| LVEDD z score                                      | -    | -2.4    | -   | -      | 2.6   | 1.9   | 5.5   | -4.3  | -    | -3.2 | -     |
| LA diameter (mm)                                   | -    | -       | -   | -      | 29    | -     | 25.6  | -     | -    | 19.6 | -     |
| LA diameter z score                                | -    | -       | -   | -      | -     | -     | 20.6  | -     | -    | 15   | -     |
| MLVWT (mm)                                         | -    | 6       | -   | 10     | 9     | 6     | 7     | -     | 15   | -    | -     |
| MLVWT z score                                      | -    | 3.4     | -   | -      | 3.2   | 4.3   | 6.5   | -     | -    | -    | -     |
| LVOT gradient (mmHg)                               | -    | -       | -   | 4      | -     | 5     | 10    | 10    | 117  | -    | -     |
| LVOTO                                              | -    | -       | -   | No     | -     | No    | No    | No    | Yes  | No   | -     |
| Mid cavity obstruction                             | -    | No      | -   | No     | No    | No    | No    | No    | Yes  | No   | -     |

|                            |   |    |   |    |    |     |     |     |     |     |   |
|----------------------------|---|----|---|----|----|-----|-----|-----|-----|-----|---|
| SAM                        | - | No | - | No | No | No  | No  | Yes | Yes | No  | - |
| RVH                        | - | No | - | No | No | Yes | Yes | -   | Yes | Yes | - |
| RVOT<br>gradient<br>(mmHg) | - | -  | - | -  | 1  | -   | 4   | -   | 30  | -   | - |
| RVOTO                      | - | -  | - | -  | No | -   | No  | -   | Yes | -   | - |
| EF (%)                     | - | -  | - | -  | -  | 79  | 80  | -   | -   | 74  | - |

PMHx: past medical history, CCF: congestive cardiac failure, CHD: congenital heart defects, ICD: implantable cardiac defibrillator, SCD: sudden cardiac death, LVEDD: left ventricular end diastolic diameter, MLVWT: maximal wall thickness, LAd: left atrial diameter, LVOT: left ventricular outflow tract, LVOTO: LVOT obstruction, SAM: systolic anterior motion of the mitral valve, RVH: right ventricular hypertrophy, RVOT: right ventricular outflow tract, RVOTO: RVOT obstruction, EF: ejection fraction

**Table S4:** Patients with Noonan like syndrome with loose anagen hair

|                                                           | Patient 1 | Patient 2  | Patient 3 |
|-----------------------------------------------------------|-----------|------------|-----------|
| <b>Baseline demographics and clinical characteristics</b> |           |            |           |
| Gender                                                    | Male      | Male       | Male      |
| Proband?                                                  | Yes       | Yes        | Yes       |
| Age at diagnosis (months)                                 | 81.3      | -          | -         |
| Age at baseline (months)                                  | 67.7      | 64         | 6.5       |
| PMHx CHD                                                  | No        | Yes        | No        |
| Extra-cardiac manifestations                              | No        | No         | No        |
| PMHx CCF                                                  | No        | No         | No        |
| Symptoms                                                  | No        | No         | No        |
| Medication                                                | No        | b-blockers | No        |
| <b>Outcomes</b>                                           |           |            |           |
| Follow up (months)                                        | 198.9     | 9.8        | 16.6      |
| Death                                                     | No        | Yes        | Yes       |
| Cause of death                                            | -         | Unknown    | Unknown   |
| Age at death (months)                                     | -         | 73.8       | 23.1      |
| SCD or equivalent event                                   | No        | No         | No        |
| Myectomy                                                  | No        | No         | No        |
| CCF admission                                             | No        | No         | No        |
| ICD implantation                                          | No        | No         | No        |
| Heart transplant                                          | No        | No         | No        |
| <b>Echocardiographic parameters</b>                       |           |            |           |
| LVEDD (mm)                                                | 29.7      | -          | -         |
| LVEDD z score                                             | +4.7      | -          | -         |
| LA diametre (mm)                                          | 26        | 25         |           |
| LA diametre z score                                       | +3.4      | -          | -         |
| MLVWT (mm)                                                | 8         | 7          | 9         |
| MLVWT z score                                             | +9.2      | -          | -         |
| LVOT gradient (mmHg)                                      | 45        | 16         | 27        |
| LVOTO                                                     | Yes       | No         | No        |
| Mid cavity obstruction                                    | No        | No         | No        |
| SAM                                                       | No        | No         | No        |
| RVH                                                       | Yes       | No         | No        |
| RVOT gradient (mmHg)                                      | -         | -          | 4         |
| RVOTO                                                     | No        | No         | No        |
| EF (%)                                                    | 75        | -          | -         |
| Systolic dysfunction                                      | No        | -          | -         |

PMHx: past medical history, CCF: congestive cardiac failure, CHD: congenital heart defects, ICD: implantable cardiac defibrillator, SCD: sudden cardiac death, LVEDD: left ventricular end diastolic diameter, MLVWT: maximal wall thickness, LAd: left atrial diameter, LVOT: left ventricular outflow tract, LVOTO: LVOT obstruction, SAM: systolic anterior motion of the mitral valve,

RVH: right ventricular hypertrophy, RVOT: right ventricular outflow tract, RVOTO: RVOT obstruction, EF: ejection fraction

**Table S5:** Demographics and baseline clinical characteristics by most prevalent genes

|                                                       | PTPN11            | RAF1               | RIT1              | HRAS              | p value      |
|-------------------------------------------------------|-------------------|--------------------|-------------------|-------------------|--------------|
| Gender (Male), n (%)                                  | 16 (55.2)         | 12 (66.7)          | 6 (75)            | 3 (37.5)          | 0.431        |
| Age at diagnosis (months), median (25th-75th centile) | 0.4 (0 - 9)       | 2.7 (0.1 - 8.4)    | 0.23 (0 - 8.7)    | 2.83 (0 - 121.9)  | <b>0.041</b> |
| Age at baseline (months), median (25th-75th centile)  | 11.1 (5.7 - 50.8) | 37.6 (11.6 - 64.3) | 2.41 (0.11 - 8.8) | 12.1 (6.7 - 35.4) | 0.889        |
| Proband, n (%)                                        | 22 (75.9)         | 16 (88.9)          | 7 (87.5)          | 8 (100)           | 0.741        |
| FHx HCM, n(%)                                         | 5 (17.2)          | 1 (5.6)            | -                 | -                 | 0.472        |
| PMHx CCF, n(%)                                        | 10 (34.5)         | 2 (11.1)           | -                 | -                 | 0.151        |
| PMHx arrhythmia, n (%)                                | 3 (10.3)          | 1 (5.6)            | 1 (12.5)          | 1 (12.5)          | 1            |
| CHD, n (%)                                            | 16 (55.2)         | 3 (16.7)           | 7 (87.5)          | 2 (25)            | <b>0.002</b> |
| Extra-cardiac manifestations                          | 10 (34.5)         | 10 (55.6)          | 2 (25)            | 3 (37.5)          | 0.531        |
| Symptoms, n (%)                                       | 10 (34.5)         | 8 (44.4)           | 2 (25)            | -                 | 0.143        |
| Medications, n (%)                                    | 18 (62.1)         | 11 (61.1)          | 4 (57.1)          | 4 (50)            | 0.958        |

n: number of patients, FHx: family history, HCM: hypertrophic cardiomyopathy, SCD: sudden cardiac death, PMHx: past medical history, CCF: congestive cardiac failure, CHD: congenital heart defects

**Table S6:** Clinical and genetics characteristics and outcomes by era of presentation

|                                                 | 1985-1999           | 2000-2010         | 2011-2020            | p value (*) | p value (**) |
|-------------------------------------------------|---------------------|-------------------|----------------------|-------------|--------------|
|                                                 | (n = 18)            | (n = 56)          | (n = 75)             |             |              |
| Male, n (%)                                     | 10 (55.6)           | 36 (64.3)         | 47 (62.7)            | 0.708       | 0.758        |
| Median age at presentation, months (IQR)        | 89.7 (29.6 – 139.7) | 323 (8.7 – 92.1)  | 11.9 (2.7 – 61.8)    | 0.003       | 0.063        |
| Syndrome, n (%)                                 |                     |                   |                      | 0.124       | 0.152        |
| NS                                              | 15 (83.3)           | 43 (76.8)         | 53 (70.7)            |             |              |
| NSML                                            | 3 (16.7)            | 2 (3.6)           | 7 (9.3)              |             |              |
| CS                                              |                     | 1 (1.8)           | 5 (6.7)              |             |              |
| CFCS                                            |                     | 5 (8.9)           | 1 (1.4)              |             |              |
| Noonan-like                                     |                     | 4 (7.1)           | 8 (10.7)             |             |              |
| NS_LAH                                          |                     |                   | 3 (4)                |             |              |
| Genetic testing done, n (%)                     | 9 (50)              | 44 (78.6)         | 64 (85.3)            | <0.001      | <0.001       |
| Variant identified (yes), n (%)                 | 3 (33.3)            | 27 (61.4)         | 50 (78.1)            | <0.001      | 0.007        |
| Which variant, n (%)                            |                     |                   |                      | 0.255       | 0.095        |
| PTPN11                                          | 2 (66.7)            | PTPN11            | 7 (25.9)             |             |              |
| KRAS                                            | 1 (33.3)            | RAF1              | 6 (22.2)             |             |              |
| RIT1                                            |                     | RIT1              | 4 (14.8)             |             |              |
| HRAS                                            |                     | HRAS              | 2 (7.4)              |             |              |
| KRAS                                            |                     | KRAS              | 1 (3.7)              |             |              |
| LZTR1                                           |                     | LZTR1             | 4 (14.8)             |             |              |
| BRAF                                            |                     | BRAF              | 2 (7.4)              |             |              |
| MEK2                                            |                     | MEK2              | 1 (3.7)              |             |              |
| 2 <sup>nd</sup> variant identified (yes), n (%) | -                   | 4 (7.1)           | 1 (1.3)              | 0.742       | 0.365        |
| Median follow up, months (IQR)                  | 209.5 (167.4 – 216) | 215.7 (215 – 216) | 113.1 (43.9 – 182.9) | <0.001      | <0.001       |

|                                |          |          |         |       |       |
|--------------------------------|----------|----------|---------|-------|-------|
| SCD or equivalent event, n (%) | 2 (11.1) | 4 (7.1)  | 6 (8)   | 0.457 | 0.959 |
| Heart transplant, n (%)        | -        | 1 (1.8)  | 2 (2.7) | 0.197 | 0.829 |
| Myectomy, n (%)                | 3 (16.7) | 5 (8.9)  | 6 (8)   | 0.447 | 0.405 |
| Death, n (%)                   | 3 (16.7) | 8 (14.3) | 12 (16) | 0.62  | 0.453 |

n: number of patients, IQR: interquartile range, NS: Noonan syndrome, NSML: Noonan syndrome with multiple lentigines, CS: Costello syndrome, CFCS: cardiofaciocutaneous syndrome, SCD: sudden cardiac death. (\*) represents p values for whole group, (\*\*) subgroup analysis excluding the first era

**Table S7:** nucleotide and protein changes

| Affected Gene | Nucleotide code | Protein code | N |
|---------------|-----------------|--------------|---|
| PTPN11        | 836A>G          | Tyr279Cys    | 6 |
|               | 1528C>G         | Gln510Glu    | 3 |
|               | 922A>G          | Asn308Asp    | 2 |
|               | 102G>T          | Lys34Asn     | 1 |
|               | 188A>G          | Tyr63Cys     | 1 |
|               | 846C>G          | Ile282Met    | 1 |
|               | 218C>T          | Thr73Ile     | 1 |
|               | 923A>G          | Asn308Ser    | 1 |
|               | 854T>C          | Phe285Ser    | 1 |
|               | 236A>G          | Glu79Arg     | 1 |
|               | 417G>C          | Glu139Asp    | 1 |
|               | 1528C>G         | Gln510Glu    | 1 |
|               | 768G>C          | Asn320Ser    | 1 |
|               | 1403C>T         | Thr468Met    | 1 |
| RAF1          | 770C>T          | Ser257Leu    | 2 |
|               | 770C>T          | Ser257Gly    | 1 |
|               | 766A>G          | Arg256Gly    | 1 |
|               | 775T>A          | Ser259Thr    | 1 |
|               | 1082G>C         | Gly361Ala    | 1 |
|               | 779c >T         | Thr260Ile    | 1 |
|               | 76BG>T          | Arg256Ser    | 1 |
|               | 781C>T          | Pro261Ser    | 1 |
| RIT1          | 244T>C          | Phe82Leu     | 2 |
|               | 151G>T          | Asp51Tyr     | 1 |
|               | 284G>C          | Gly95Ala     | 1 |
|               | 229G>A          | Ala77Thr     | 1 |
|               | 244T>A          | He82Lle      | 1 |
| HRAS          | 34G>A           | Gly12Ser     | 5 |
|               | 64C>A           | Gln22Lys     | 1 |
|               | 466T>C          | Phe156Leu    | 1 |
|               | 34G>T           | Gly12Cys     | 1 |
| KRAS          | 179G>T          | Gly60Val     | 2 |
|               | 346A>C          | ASn116His    | 1 |
|               | 173C>T          | Thr58Ile     | 1 |
| LZTR1         | 3493C>T         | Lys1165Glu   | 1 |
|               | 1234C>T         | Arg412Cys    | 1 |
|               | 290G>T          | Arg97Leu     | 1 |
| SHOC2         | 4A>G            | Ser2Gly      | 1 |
| BRAF          | 1782T>G         | Asp5974Glu   | 1 |



**Table S8:** Echocardiographic data by most prevalent genes

|                                                | PTPN11            | RAF1              | RIT1                 | HRAS              | p-values     |
|------------------------------------------------|-------------------|-------------------|----------------------|-------------------|--------------|
| LVEDD (mm), median (25-75th centile)           | 23.8 (20.2 - 29)  | 23.3 (20 - 31.5)  | 18.1 (17.5 - 19.6)   | 21 (17.2 - 26.6)  | 0.469        |
| LVEDD z score, mean (SD)                       | +0.01 (2.6)       | -0.15 (3)         | -2.66 (0.9)          | -                 | 0.565        |
| LA diametre (mm), median (25-75th centile)     | 27 (25.8 - 27.9)  | 18.2 (15.3 - 36)  | 13.3 (12.6 - 26.5)   | 19.6 (-)          | 0.493        |
| LA diametre z score, mean (SD)                 | +25.86 (7.3)      | +28.84 (16.6)     | +4.04 (1.32)         | -                 | 0.308        |
| MLVWT (mm), median (25th-75th centile)         | 10.5 (8.5 - 14.5) | 14 (10 - 18)      | 7 (6 - 10)           | 7 (6 - 8)         | <b>0.002</b> |
| MLVWT z score, mean (SD)                       | +12.23 (6.9)      | +16.65 (3.9)      | +6.57 (0.4)          | -                 | 0.43         |
| LVOT gradient (mmHg), median (25-75th centile) | 36 (17 - 60)      | 43 (16 - 58)      | 100 (55 (7.5 - 100)) | 6.5 (4.5 - 26.5)  | 0.232        |
| LVOTO, n (%)                                   | 14 (63.6)         | 8 (61.5)          | 2 (50)               | 1 (12.5)          | 0.338        |
| Mid cavity obstruction, n (%)                  | 15 (68.2)         | 8 (80)            | 2 (33.3)             | -                 | <b>0.003</b> |
| SAM, n (%)                                     | 17 (65.4)         | 9 (64.3)          | 3 (42.9)             | 1 (12.5)          | 0.073        |
| RVH, n (%)                                     | 14 (60.9)         | 7 (53.9)          | 6 (75)               | 3 (37.5)          | 0.477        |
| RVOT gradient (mmHg), median (25-75th centile) | 18.5 (3.5 - 57.5) | 21 (4 - 70.5)     | 16.5 (10 - 57)       | 2 (2 - 2.5)       | 0.401        |
| RVOTO, n (%)                                   | 6 (50)            | 4 (57.1)          | 3 (50)               | -                 | 0.55         |
| EF (%), median (25-75th centile)               | 79 (77.5 - 85.5)  | 86 (77.5 - 92.9)  | 79.5 (70.5 - 87)     | 80 (76.5 - 83.5)  | 0.703        |
| Systolic dysfunction, n (%)                    | -                 | -                 | -                    | -                 | 0.897        |
| E/E' average, median (25-75th centile)         | 10 (7.2 - 12.9)   | 10.8 (7.3 - 28.3) | 15.07 (-)            | 10.2 (9.6 - 11.6) | 0.675        |
| Diastolic dysfunction, n (%)                   | 2 (18.2)          | 2 (66.7)          | 1 (100)              | -                 | 0.197        |

LVEDD: left ventricular end diastolic diameter, MLVWT: maximal wall thickness, LAd: left atrial diameter, LVOT: left ventricular outflow tract, LVOTO: LVOT obstruction, SAM: systolic anterior motion of the mitral valve, RVH: right ventricular hypertrophy, RVOT: right ventricular outflow tract, RVOTO: RVOT obstruction, EF: ejection fraction

**Table S9:** Electrocardiographic data at baseline assessment

|                          |                                   | Total | %    |
|--------------------------|-----------------------------------|-------|------|
| Sinus rhythm             |                                   | 91    | 97.8 |
| Left axis deviation      |                                   | 20    | 25.3 |
| Right axis deviation     |                                   | 27    | 34.2 |
|                          | Superior axis                     | 21    | 44.7 |
| PR interval prolongation |                                   | 5     | 6.4  |
| Right atrial enlargement |                                   | 17    | 19.8 |
| Left atrial enlargement  |                                   | 18    | 20.9 |
| QTc prolongation         |                                   | 5     | 6.4  |
| Voltage criteria for LVH |                                   | 60    | 69.8 |
| Conduction abnormalities | Intraventricular conduction delay | 43    | 48.9 |
|                          | RBBB                              | 2     | 2.3  |
|                          | LBBB                              | 4     | 4.6  |
| Pathological Q waves     | Inferior leads                    | 19    | 21.4 |
|                          | Lateral leads                     | 10    | 11.2 |
|                          | Anterior leads                    | 1     | 1.1  |
|                          | >1 location                       | 4     | 4.5  |
| T wave inversion         | Inferior leads                    | 4     | 4.8  |
|                          | Lateral leads                     | 13    | 15.5 |
|                          | Anterior leads                    | 4     | 4.8  |
|                          | >1 location                       | 9     | 10.7 |
| ST depression (<1mm)     | Inferior leads                    | 2     | 2.4  |
|                          | Lateral leads                     | 2     | 2.4  |
|                          | Anterior leads                    | 3     | 3.6  |
|                          | >1 location                       | 4     | 4.8  |
| ST elevation (>2mm)      | Absent                            | 86    | 92.9 |
|                          | Present                           | 7     | 7.5  |

LVH: left ventricular hypertrophy, RBBB: right bundle branch block, LBBB: left BBB

**Table S10:** Outcomes by most prevalent genes

|                                                   | PTPN11         | RAF1     | RIT1     | HRAS               | p value |
|---------------------------------------------------|----------------|----------|----------|--------------------|---------|
| Death, n (%)                                      | 3 (10.3)       | 1 (5.6)  | -        | 2 (25)             | 0.44    |
| Age at death (months), median (25th-75th centile) | 3.3 (1.7 - 24) | 5.26 (-) | -        | 12.4 (11.9 - 12.8) | 0.651   |
| Myectomy, n (%)                                   | 3 (10.3)       | 3(16.7)  | 1 (12.5) | -                  | 0.37    |
| ICD implantation, n (%)                           | 2 (6.9)        | 1 (5.6)  | 1 (12.5) | -                  | 0.889   |
| CCF admission, n (%)                              | 6 (20.7)       | -        | 2 (25)   | -                  | 0.17    |
| Heart transplant, n (%)                           | 2 (6.9)        | -        | -        | -                  | 0.733   |
| NSVT, n (%)                                       | 1 (3.3)        | 1 (5.6)  | -        | 1 (12.5)           | 0.523   |
| SCD or equivalent event, n (%)                    | 2 (6.9)        | 1 (5.6)  | 1 (12.5) | 1 (12.5)           | 0.316   |

n: number of patients, CCF: congestive cardiac failure, ICD: implantable cardiac defibrillator, NSVT: non-sustained ventricular tachycardia, SCD: sudden cardiac death

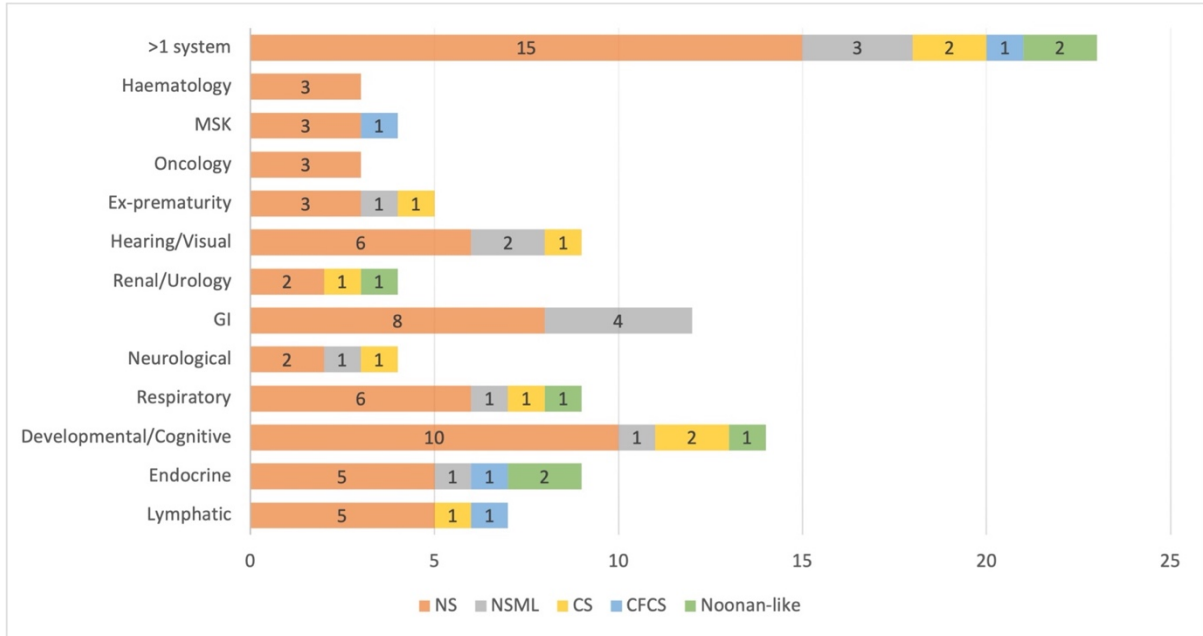

**Figure S1:** Extra-cardiac manifestations by RASopathy syndrome  
 X axis represents the absolute number of patients in each category by RASopathy syndrome and Y axis represents the system involved

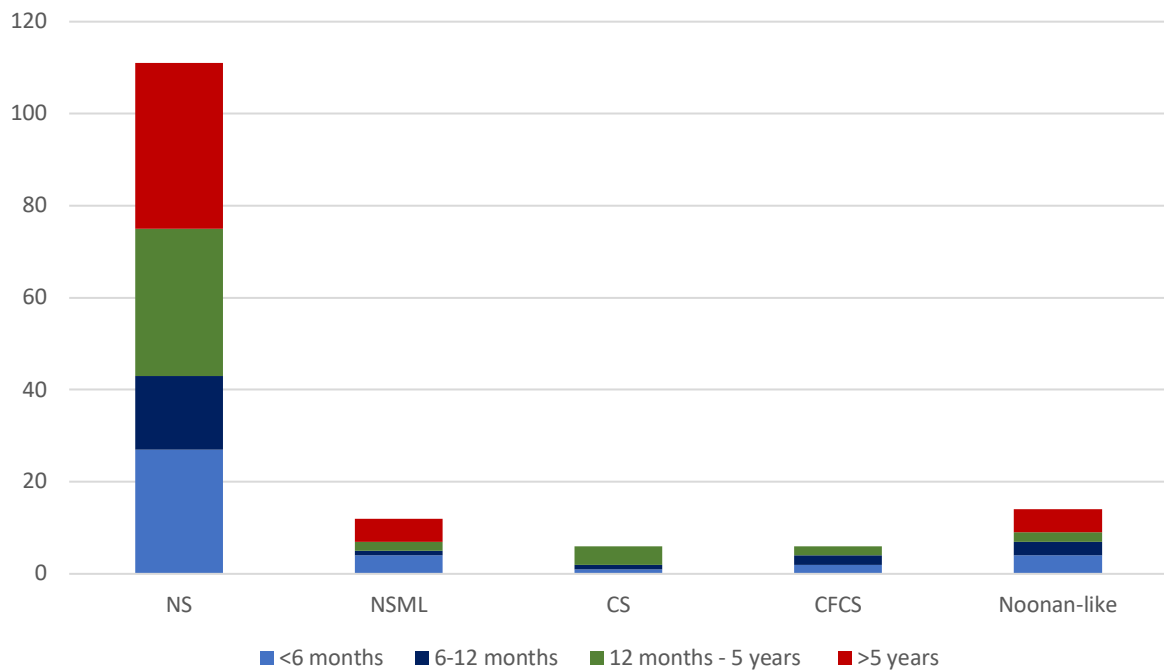

**Figure S2:** Age category by RASopathy Syndrome  
 X axis represents the different RASopathy syndromes and Y axis represents the absolute number in each age category

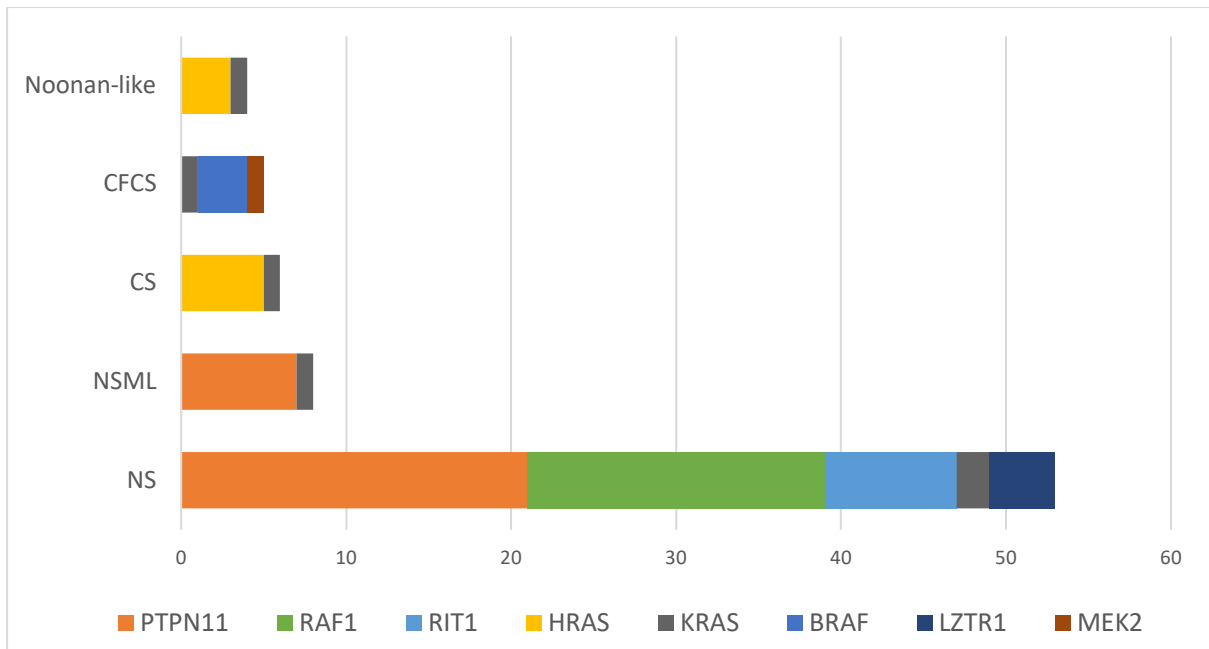

**Figure S3:** Gene mutation by RASopathy Syndrome

X axis represents the absolute number of each RASopathy syndrome by gene variant and Y axis represents each RASopathy syndrome

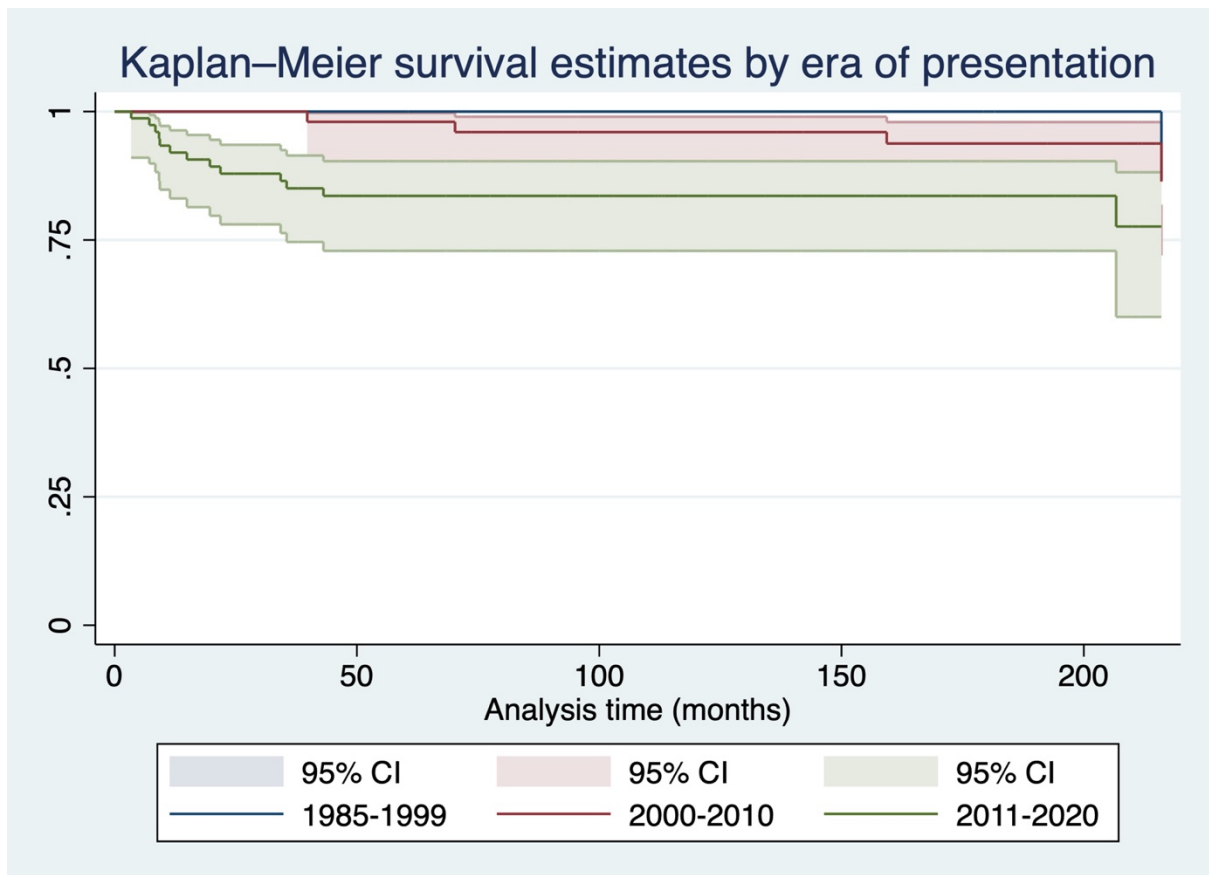

**Figure S4:** Kaplan-Meier survival estimates by era of presentation

(x) axis represents frequencies and (y) axis analysis time in months, 95% confidence intervals are shown for the corresponding curves in shading, ( $p = 0.453$ )
